# Supplementary material for: Chelerythrine Chloride: A Potential Rumen Microbial Urease Inhibitor Screened by Targeting UreG
Source: MDPI journal article supplement (doi:10.3390/ijms22158212), 2021-07-30
Supplement: s1 [file s1]

## Supplemental material

Table S1. Chemical structures of some urease inhibitors.

| Category         | Urease inhibitor                             | Chemical formula                             | Structure                                                                             |
|------------------|----------------------------------------------|----------------------------------------------|---------------------------------------------------------------------------------------|
| urea analogues   | Thiourea                                     | $\text{CH}_4\text{N}_2\text{S}$              | 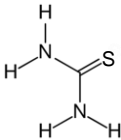   |
| hydroxamic acids | Acetohydroxamic acid<br>(AHA)                | $\text{C}_2\text{H}_5\text{NO}_2$            |    |
| phosphoramidate  | N-(N-butyl)thiophosphoric<br>Triamide (NBPT) | $\text{C}_4\text{H}_{14}\text{N}_3\text{PS}$ |    |
|                  | 1, 4-Benzoquinone                            | $\text{C}_6\text{H}_4\text{O}_2$             |  |
|                  | Catechol                                     | $\text{C}_6\text{H}_6\text{O}_2$             |  |

Table S2. Kinetic parameters of UreG GTPase activity in the presence of different concentrations of chelerythrine chloride (0, 6.25, 12.5, and 25  $\mu\text{M}$ ).

| Concentration ( $\mu\text{M}$ ) | Equation               | R square | $V_{\text{max}}$ | $K_m$  |
|---------------------------------|------------------------|----------|------------------|--------|
| 25                              | $y = 6.122x + 0.1158$  | 0.9740   | 8.64             | 52.87  |
| 12.5                            | $y = 4.662x + 0.05278$ | 0.9904   | 18.95            | 88.33  |
| 6.25                            | $y = 4.451x + 0.04340$ | 0.9937   | 23.04            | 102.56 |
| 0                               | $y = 2.836x + 0.04824$ | 0.9784   | 20.73            | 58.79  |
